# Supplementary material
Source: Springer Nature journal article supplement (https://www.springermedizin.de/resource/supplementary/12879_2011_1431_MOESM2_ESM.pdf/9443218)
Supplement: MOESM2 [file 9443218]

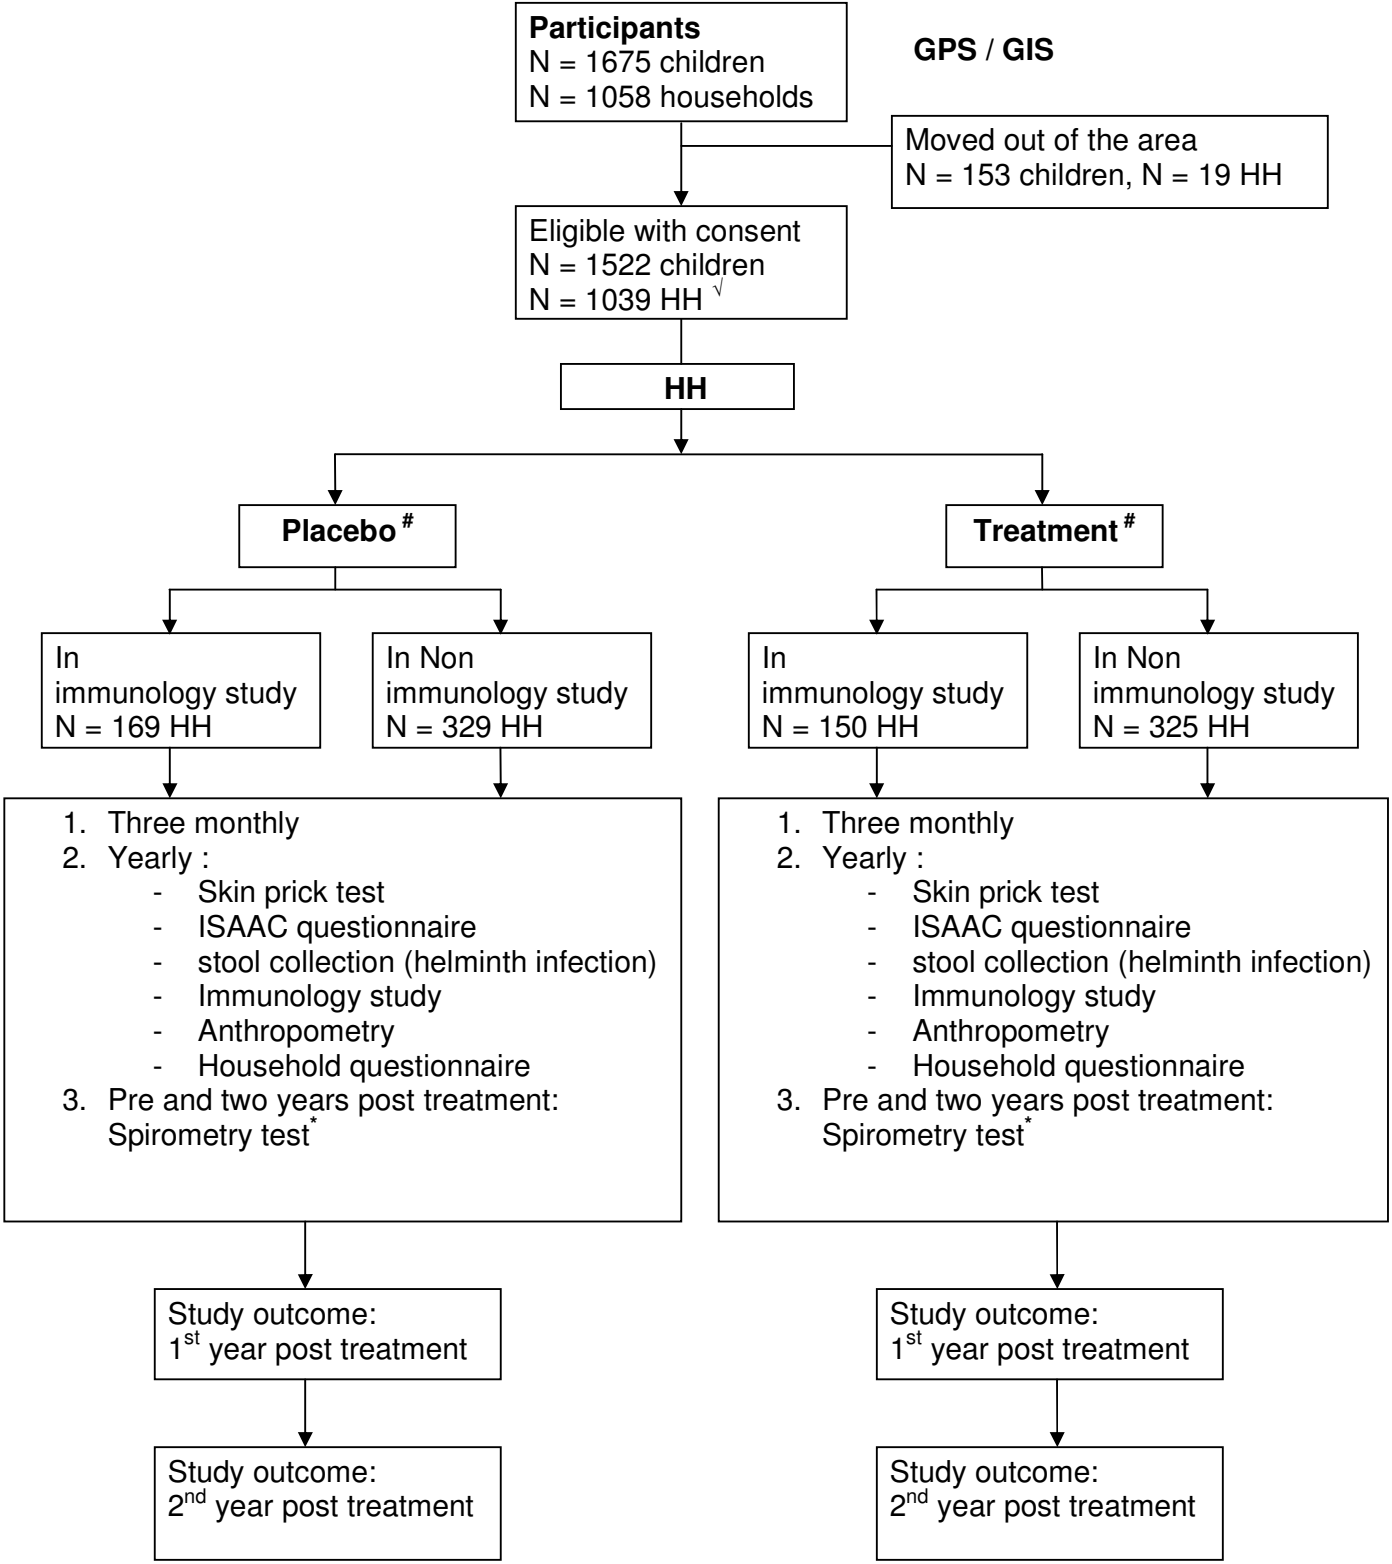

√ 66 households do not have children 5-15 years old  
 # Three monthly treatment with albendazole or placebo  
 \* in a subset  
 N number
